# Supplementary material for: Identification of aluminum-activated malate transporters (ALMT) family genes in hydrangea and functional characterization of HmALMT5/9/11 under aluminum stress
Source: PeerJ. 2022 Jun 24;10:e13620. doi: 10.7717/peerj.13620 (PMC9235816; doi:10.7717/peerj.13620)
Supplement: Supplemental Information 4 [file peerj-10-13620-s004.xlsx]

## Sheet: Sheet1
Table S1. Primers used in this study
Gene Name	Forward Primer	Reverse Primer
HmALMT1 (used in qRT-PCR)	GCAATGTGGGCTGTGATGAC	GCATGCTTCTCCGGAAAACC
HmALMT2 (used in qRT-PCR)	GGTGCTTTTGGGATTGGAGC	CACCGCCCCATAGTCATACC
HmALMT3 (used in qRT-PCR)	AACCAACCCAAAGAGCACCT	GGGCCTGCATTCTCGGAATA
HmALMT4 (used in qRT-PCR)	TCGCTGCAACAACTCTCTCA	TTTTCGCGATGCTCTCTCCA
HmALMT5 (used in qRT-PCR)	CCTGTATTGAGGGATGCCTGG	CCGAATTTTCCATGCCACGG
HmALMT6 (used in qRT-PCR)	CTTGGATTATGACCGCCCGT	AGTCCCAGCGGTCTCATTTG
HmALMT7 (used in qRT-PCR)	GGTGTTCATTGGGTTGCCAC	ACTCATCCACTCGGTACCCA
HmALMT8 (used in qRT-PCR)	CGCAGAGTCCGTTAATGAGC	GTCCTTCTTCTCCGGTGGTG
HmALMT9 (used in qRT-PCR)	CGAATCTCATGTACGGCCGA	CTCAACGGGCTCCTTGAACT
HmALMT10 (used in qRT-PCR)	GCTGGATTTGCTCGATGGGA	TCGACGTGTTGCTGCTTACT
HmALMT11 (used in qRT-PCR)	ACCCAAACCACCACCAACAT	ACCTTCCTATCGGCCTCCTT
HmALMT5 (used in heterologous expression )	GGGGTACCATGAGCTCAACAGTAGTAATATGC	ATTTGCGGCCGCTTATGTGCAAACGGTTAGCTGTTG
HmALMT9 (used in heterologous expression )	GGGGTACCATGGCAGCCAAATTGGGGTCATTC	ATTTGCGGCCGCCTAACCCAGCAAATGTCCATCTCT
HmALMT11 (used in heterologous expression )	GGGGTACCATGGCCGCAGATGCAGAGAAGACT	ATTTGCGGCCGCTTAATCTGTTCCATGGGAAGGCAA
