# Supplementary material for: Identification of aluminum-activated malate transporters (ALMT) family genes in hydrangea and functional characterization of HmALMT5/9/11 under aluminum stress
Source: PeerJ. 2022 Jun 24;10:e13620. doi: 10.7717/peerj.13620 (PMC9235816; doi:10.7717/peerj.13620)
Supplement: Supplemental Information 5 [file peerj-10-13620-s005.xlsx]

## Sheet: Sheet1
Table S2 Conserved amino acid motifs of HmALMTs
No.	E-value	Width	Sites	Consensous sequence
1	8.7e-193	50	10	RPLYEGFGNNAMWAIMTVVVVFEFTVGATLSKGLNRGJGTLLAGGLGIGA
2	7.3e-124	40	10	FRHPWKQYLKIGAVLRQCAYTIEALSGCLNSEIQTPSELR
3	2.6e-154	44	10	YDYGVLIFJLTFSLVAVSGYRVDEILEJAHERLSTIAIGGAVCI
4	1e-115	29	10	QGYKSVLNSKSKEESLANFARWEPPHGRF
5	2.3e-107	41	10	VSJLICPIWAGEDLHNLVASNLEKLASSLEGCVGEYFKVVE
6	2.6e-62	29	8	GEPIILGLSVFJLGAAATFSRFFPSIKAR
7	3.7e-55	29	8	KKIGKEDPRRIIHSLKVGLALTLVSLLYY
8	6.4e-46	41	9	KIKEPCEKVSSELAKVLKELAESIKKMRKSSKADLSIEESK
9	1.5e-30	29	9	FASLLIEIVARLEKJVESVEELSELAKFK
10	0.67	13	2	HNPDQSINPPTQW
11	13	7	2	HKCGWAW
12	37	6	2	HWVASQ
13	120	35	2	TLRKQLRRPPLWPSKEVDDQEEEGGFKGDFIPRMD
14	690	9	2	YKALEDPIY
15	900	11	2	PKEDNDGDGDH
