# Supplementary material for: Identification of aluminum-activated malate transporters (ALMT) family genes in hydrangea and functional characterization of HmALMT5/9/11 under aluminum stress
Source: PeerJ. 2022 Jun 24;10:e13620. doi: 10.7717/peerj.13620 (PMC9235816; doi:10.7717/peerj.13620)
Supplement: Supplemental Information 6 [file peerj-10-13620-s006.xlsx]

## Sheet: Sheet1
	Table S3 The information of 3D structure prediction
	Gene ID	C-score	PDB Hit	TM-score	PDB classfication
	HmALMT1	-0.53	7VOJ	0.829	tranport protein
	HmALMT2	-0.46	7VOJ	0.906	tranport protein
	HmALMT3	-2.24	7VOJ	0.716	tranport protein
	HmALMT4	1.26	7VOJ	0.971	tranport protein
	HmALMT5	0.03	7VOJ	0.899	tranport protein
	HmALMT6	-1.21	2BVL	0.888	toxin
	HmALMT7	-0.66	7VOJ	0.872	tranport protein
	HmALMT8	-0.68	7VOJ	0.829	tranport protein
	HmALMT9	-2.69	7VOJ	0.75	tranport protein
	HmALMT10	-0.88	7VOJ	0.826	tranport protein
	HmALMT11	-1.72	7VOJ	0.744	tranport protein
