# Supplementary material for: Identification of aluminum-activated malate transporters (ALMT) family genes in hydrangea and functional characterization of HmALMT5/9/11 under aluminum stress
Source: PeerJ. 2022 Jun 24;10:e13620. doi: 10.7717/peerj.13620 (PMC9235816; doi:10.7717/peerj.13620)
Supplement: Supplemental Information 8 [file peerj-10-13620-s008.xlsx]

## Sheet: Sheet1
		0h	12h	24h	36h	48h	60h	72h	84h	96h	108h	120h
	PYES2.0	0	0.543	0.777	0.935	1.06	1.158	1.252	1.269	1.305	1.398	1.404
		0	0.55	0.774	0.934	0.924	1.288	1.243	1.25	1.216	1.339	1.412
		0	0.537	0.77	0.945	1.12	1.016	1.279	1.292	1.391	1.454	1.377
	PYES2.0 AVERAGE	0	0.543333	0.773667	0.938	1.03467	1.154	1.258	1.27033	1.304	1.397	1.39767
	STEV	0	0.00650641	0.00351188	0.00608276	0.100426	0.136044	0.018735	0.0210317	0.0875043	0.0575065	0.0183394
	PYES2.0-HmALMT5	0	0.358	0.571	0.691	0.757	0.841	0.961	1.275	1.358	1.841	1.809
		0	0.35	0.519	0.62	0.855	0.811	1.042	1.279	1.229	1.882	1.812
		0	0.357	0.622	0.699	0.656	0.868	0.942	1.265	1.49	1.783	1.811
	PYES2.0-HmALMT5 AVERAGE	0	0.355	0.570667	0.67	0.756	0.84	0.981667	1.273	1.359	1.83533	1.81067
	STEV	0	0.0043589	0.0515008	0.0434856	0.0995038	0.0285132	0.0531068	0.0072111	0.130503	0.0497427	0.00152753
	PYES2.0-HmALMT9	0	0.425	0.928	1.347	1.618	1.721	1.767	1.77	1.773	1.904	1.771
		0	0.423	0.92	1.344	1.517	1.719	1.764	1.771	1.781	1.838	1.606
		0	0.423	0.927	1.348	1.72	1.718	1.769	1.773	1.779	1.771	1.857
	PYES2.0-HmALMT9 AVERAGE	0	0.423667	0.925	1.34633	1.61833	1.71933	1.76667	1.77133	1.77767	1.83767	1.74467
	STEV	0	0.0011547	0.0043589	0.00208167	0.1015	0.00152753	0.00251661	0.00152753	0.00416333	0.0665006	0.127555
	PYES2.0-HmALMT11	0	0.444	0.627	0.754	0.992	1.373	1.631	1.689	1.781	1.794	1.863
		0	0.442	0.628	0.756	0.894	1.373	1.682	1.661	1.709	1.853	1.932
		0	0.447	0.63	0.752	1.091	1.372	1.579	1.718	1.898	1.731	1.833
	PYES2.0-HmALMT11 AVERAGE	0	0.444333	0.628333	0.754	0.992333	1.37267	1.63067	1.68933	1.796	1.79267	1.876
	STEV	0	0.00251661	0.00152753	0.002	0.0985004	0.00057735	0.0515008	0.0285015	0.0953887	0.0610109	0.0507642
